# Supplementary material for: Triflic acid-catalyzed adamantylation of aromatics in [BMIM][OTf] ionic liquid; synthetic scope and mechanistic insight
Source: Royal Society of Chemistry journal article supplement (doi:10.1039/b416997b), 2005-01-01
Supplement: b416997b-esi.pdf [file b416997b-esi.pdf]

Supporting Information

**Triflic Acid-Catalyzed Adamantylation of Aromatics in [BMIM][OTf]  
Ionic Liquid; Synthetic Scope and Mechanistic Insight<sup>+</sup>**

Kenneth K. Laali\*, Viorel D. Sarca,<sup>a</sup> Takao Okazaki,<sup>b</sup> Aaron Brock,<sup>c</sup> and Paul Der<sup>d</sup>

Department of Chemistry, Kent State University, Kent, OH 44242, USA

|                                                                                                                                                                                                                                                                                                                                                                                                                                                                                                          | Page |
|----------------------------------------------------------------------------------------------------------------------------------------------------------------------------------------------------------------------------------------------------------------------------------------------------------------------------------------------------------------------------------------------------------------------------------------------------------------------------------------------------------|------|
| <b>Fig S1.</b> B3LYP/6-31G(d) optimized geometries and bond lengths, Å,<br>for <i>o</i> -1, <i>m</i> -1, <i>p</i> -1, <i>o</i> -2, <i>m</i> -2, <i>p</i> -2, <i>o</i> -3, <i>p</i> -3, <i>m</i> -3, <i>o</i> -1H <sup>+</sup> , <i>m</i> -1H <sup>+</sup> ,<br><i>p</i> -1H <sup>+</sup> , <i>o</i> -2H <sup>+</sup> , <i>m</i> -2H <sup>+</sup> , <i>p</i> -2H <sup>+</sup> , <i>o</i> -3H <sup>+</sup> , <i>p</i> -3H <sup>+</sup> , <i>m</i> -3H <sup>+</sup> , 4H <sup>+</sup> and 5H <sup>+</sup> . | S2   |
| <b>Fig S2.</b> HF/6-31G(d) optimized geometries and bond lengths, Å, for<br><i>o</i> -1H <sup>+</sup> , <i>m</i> -1H <sup>+</sup> , <i>p</i> -1H <sup>+</sup> , <i>o</i> -2H <sup>+</sup> , <i>m</i> -2H <sup>+</sup> , and <i>p</i> -2H <sup>+</sup> .                                                                                                                                                                                                                                                  | S9   |

Electronic Supplementary Material for Organic & Biomolecular Chemistry  
This journal is © The Royal Society of Chemistry 2005

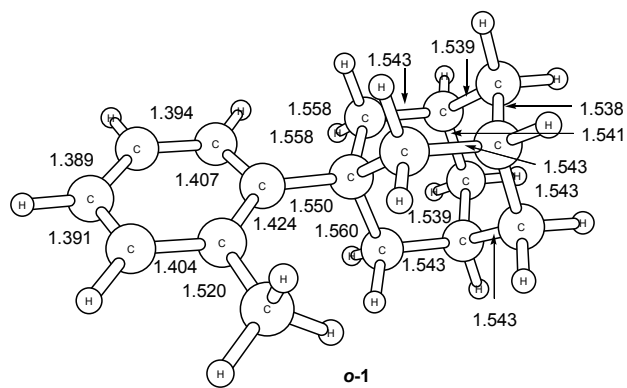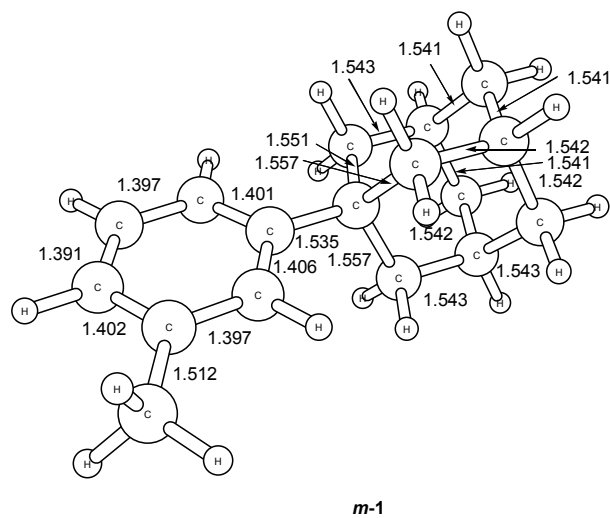

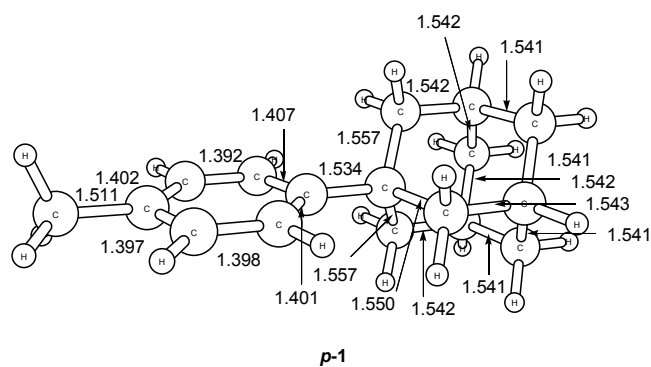

**Fig S1.** B3LYP/6-31G(d) optimized geometries and bond lengths, Å, for *o-1*, *m-1*, *p-1*, *o-2*, *m-2*, *p-2*, *o-3*, *p-3*, *m-3*, *o-1H<sup>+</sup>*, *m-1H<sup>+</sup>*, *p-1H<sup>+</sup>*, *o-2H<sup>+</sup>*, *m-2H<sup>+</sup>*, *p-2H<sup>+</sup>*, *o-3H<sup>+</sup>*, *p-3H<sup>+</sup>*, *m-3H<sup>+</sup>*, *4H<sup>+</sup>* and *5H<sup>+</sup>*.

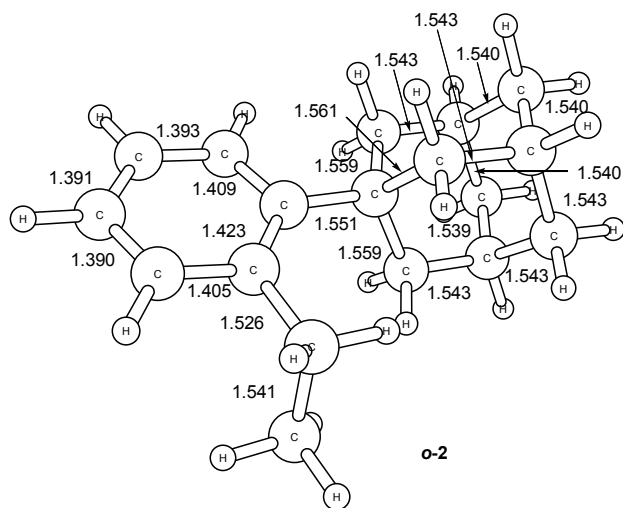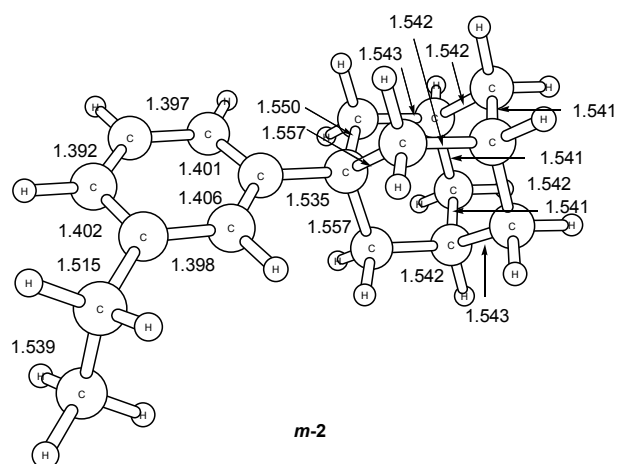

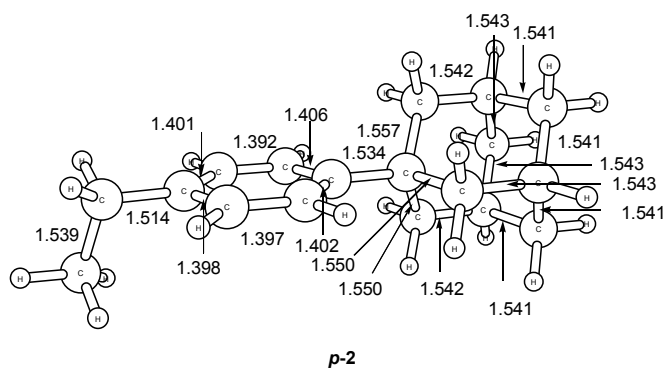

**Fig S1 (continued).**

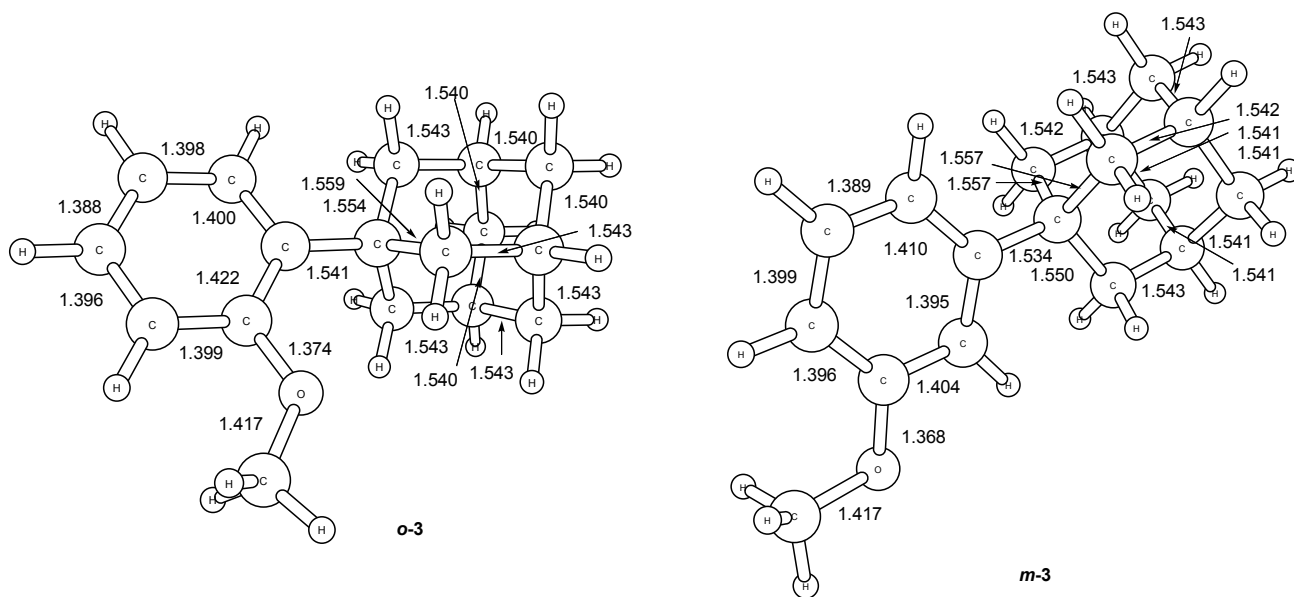

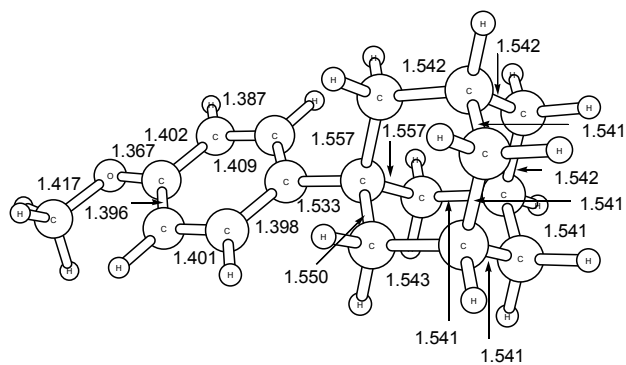

*p*-3

**Fig S1 (continued).**

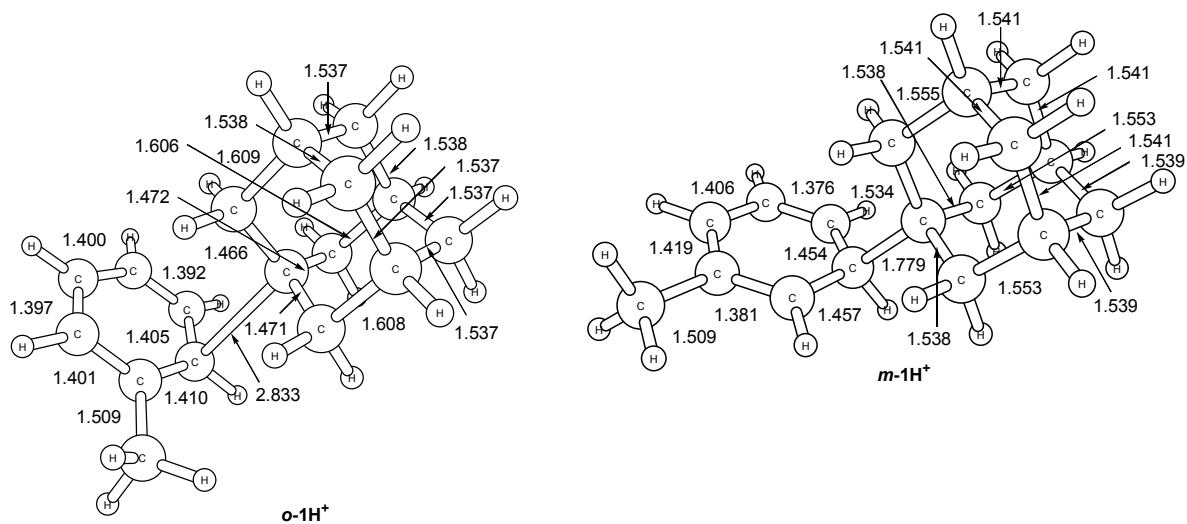

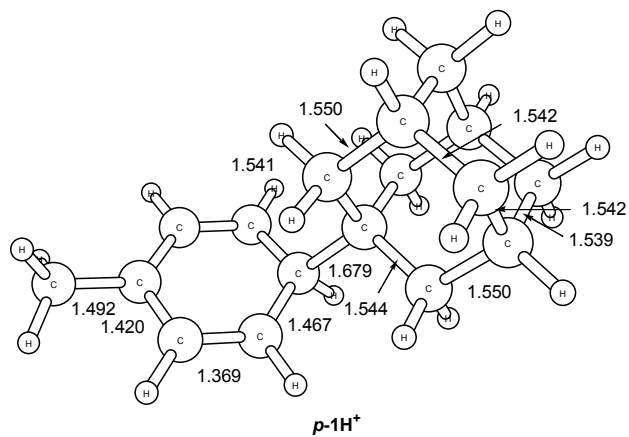

**Fig S1 (continued).**

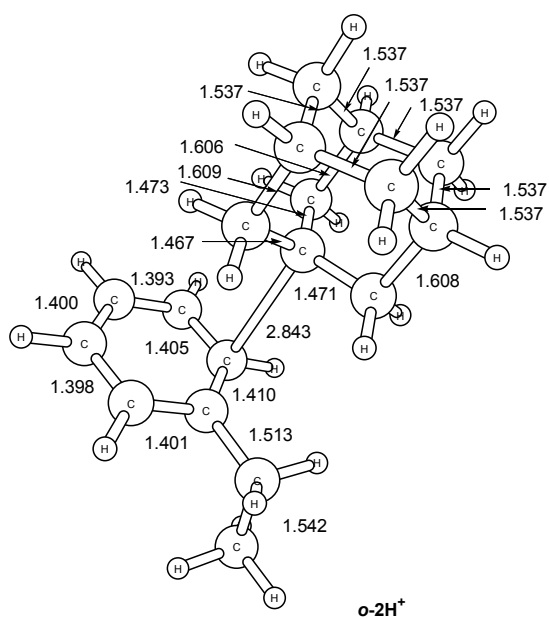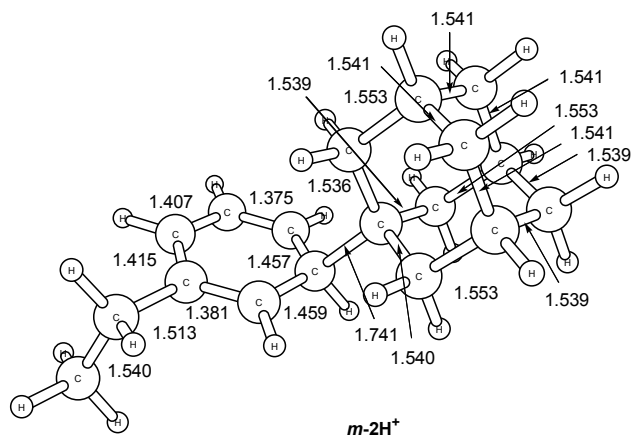

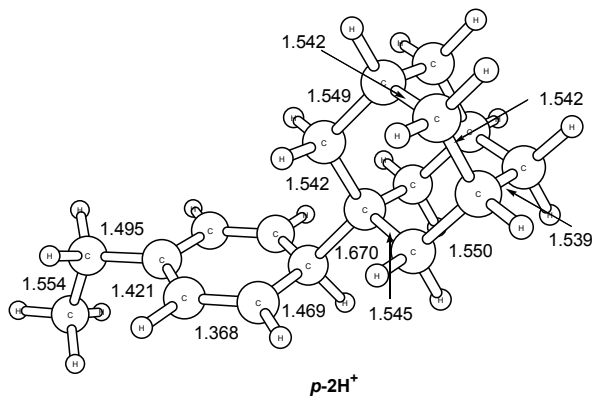

Fig S1 (continued).

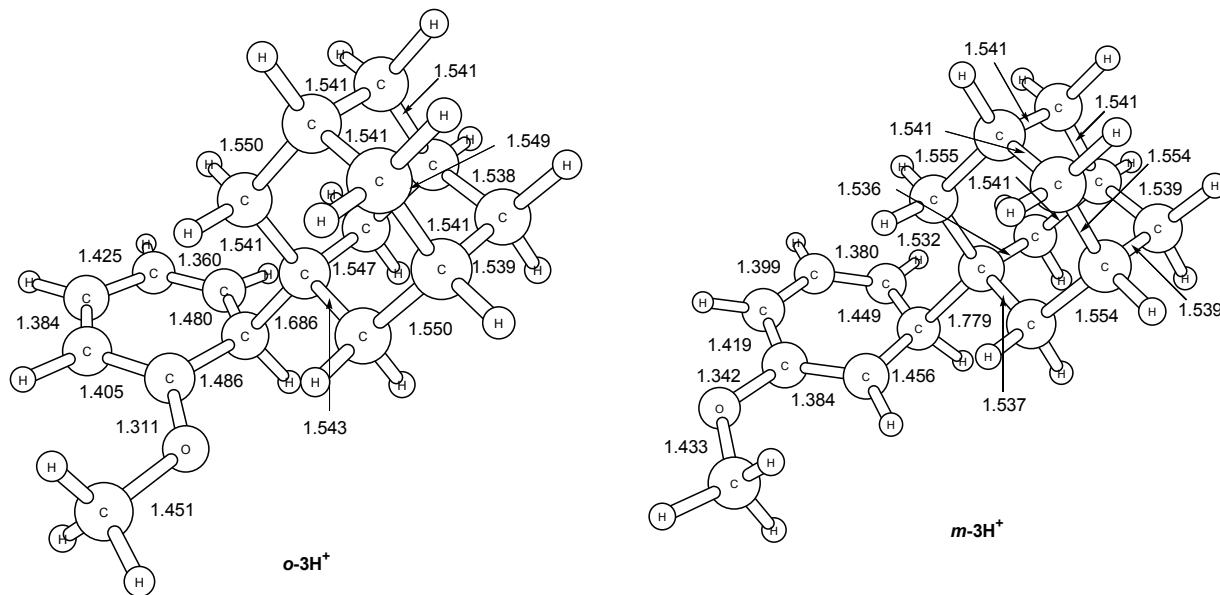



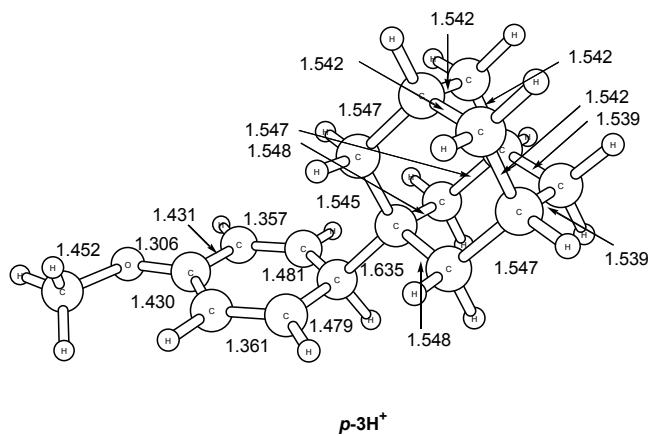

**Fig S1 (continued).**

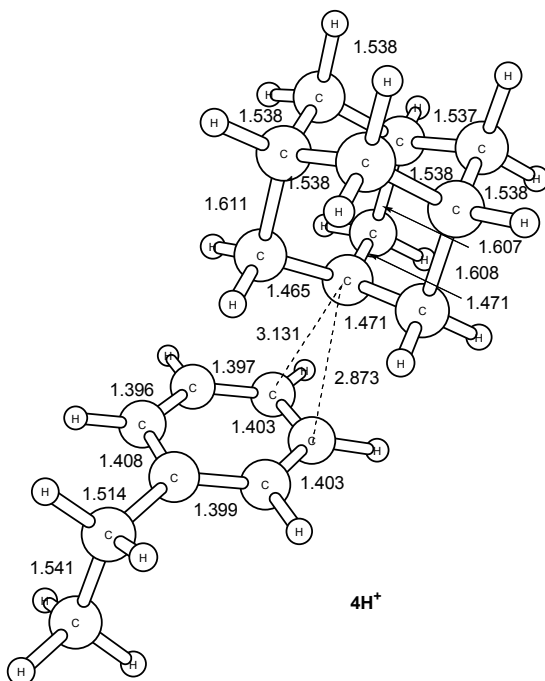

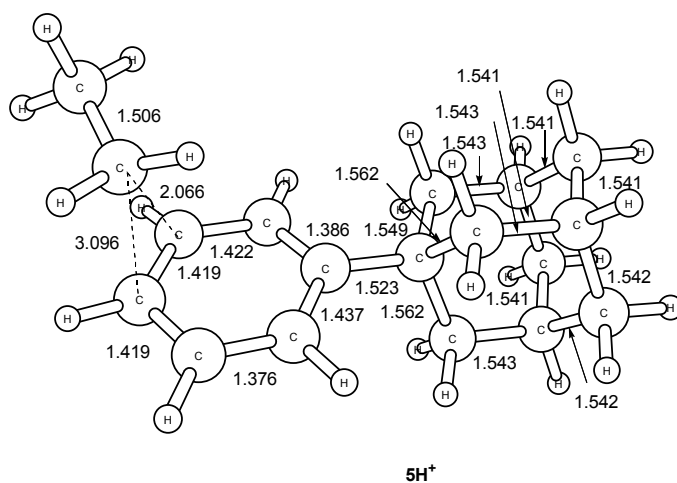

Fig S1 (continued).

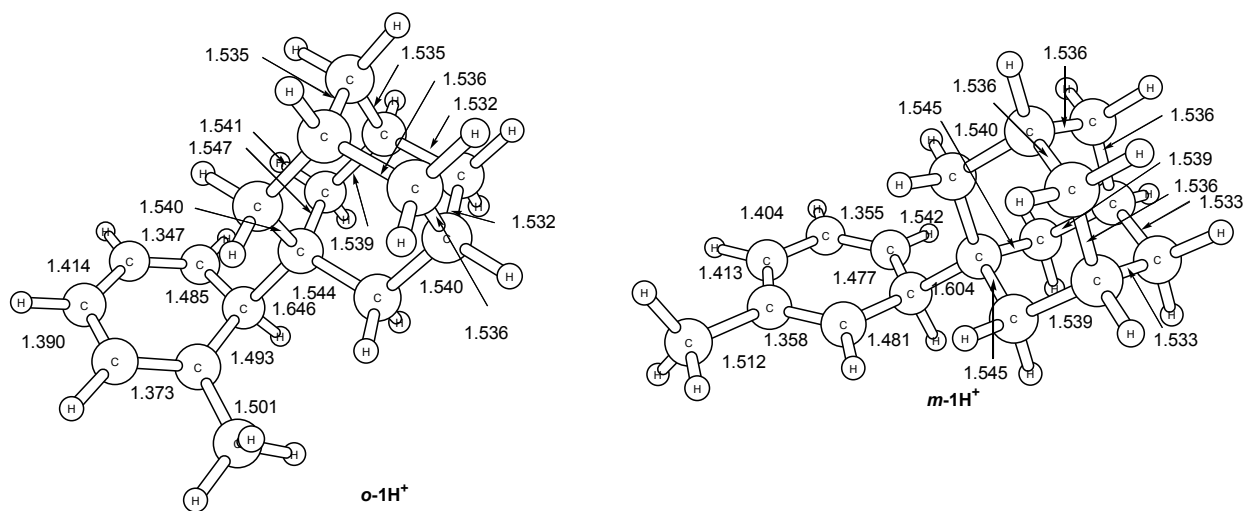

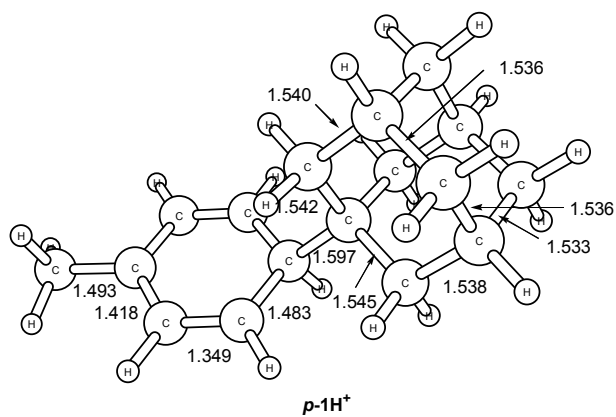

**Fig S2.** HF/6-31G(d) optimized geometries and bond lengths, Å, for  $o\text{-}1\text{H}^+$ ,  $m\text{-}1\text{H}^+$ ,  $p\text{-}1\text{H}^+$ ,  $o\text{-}2\text{H}^+$ ,  $m\text{-}2\text{H}^+$ , and  $p\text{-}2\text{H}^+$ .

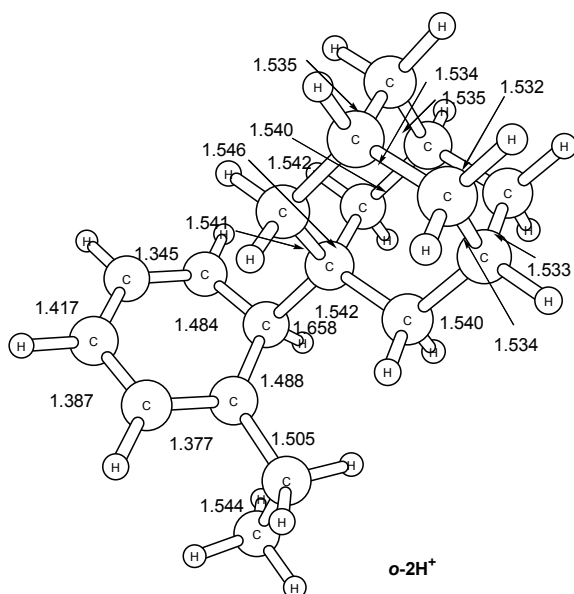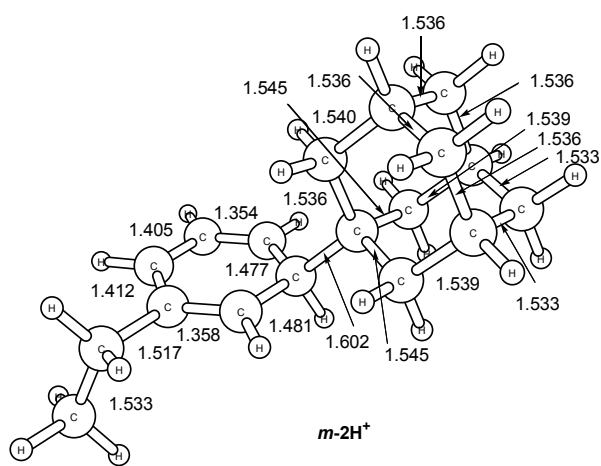

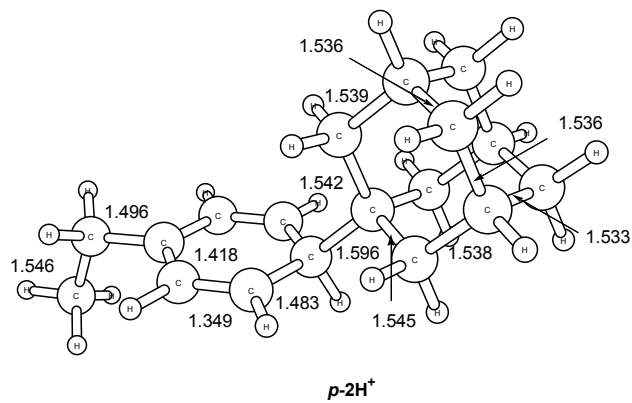

**Fig S2 (continued).**
